# Supplementary material
Source: PubMed Central journal article supplement (PMC3131872)

**a**

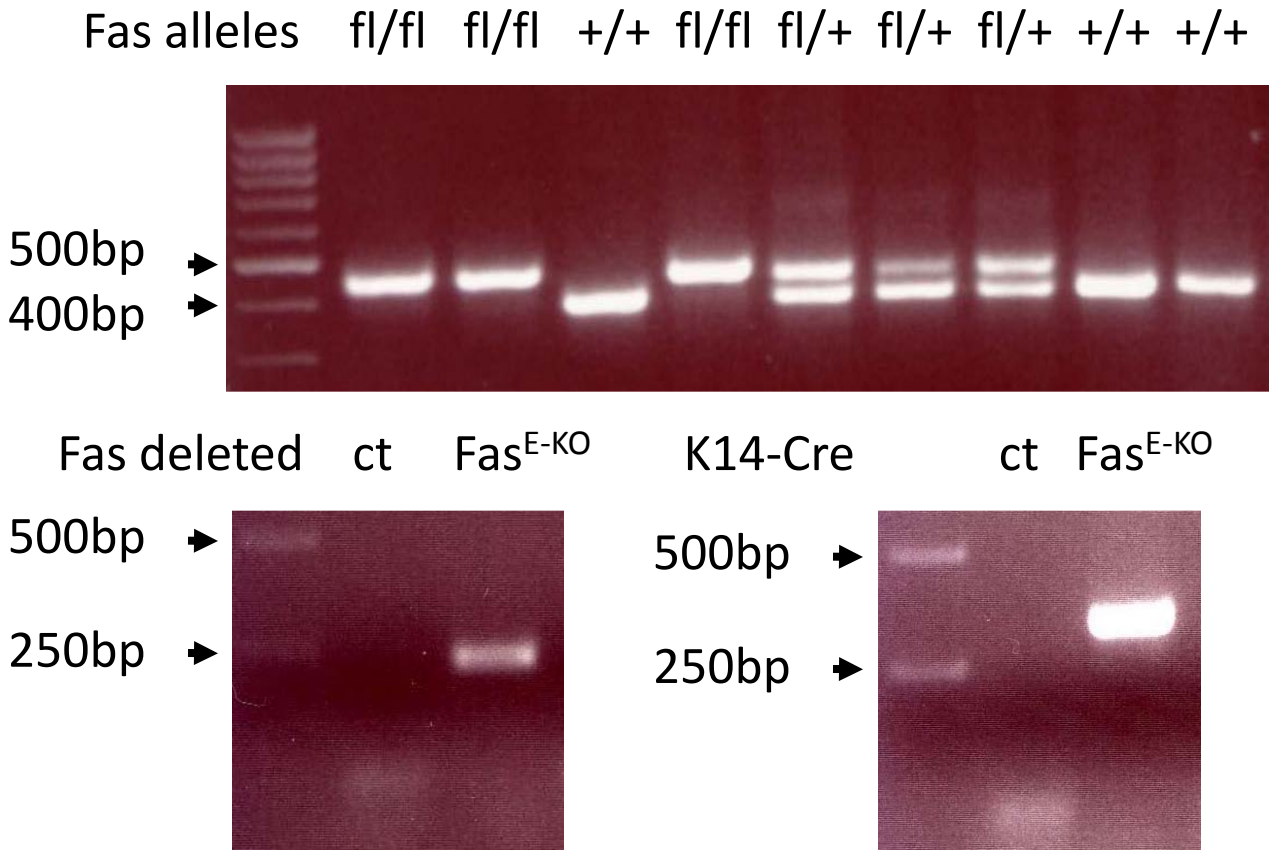

**b**

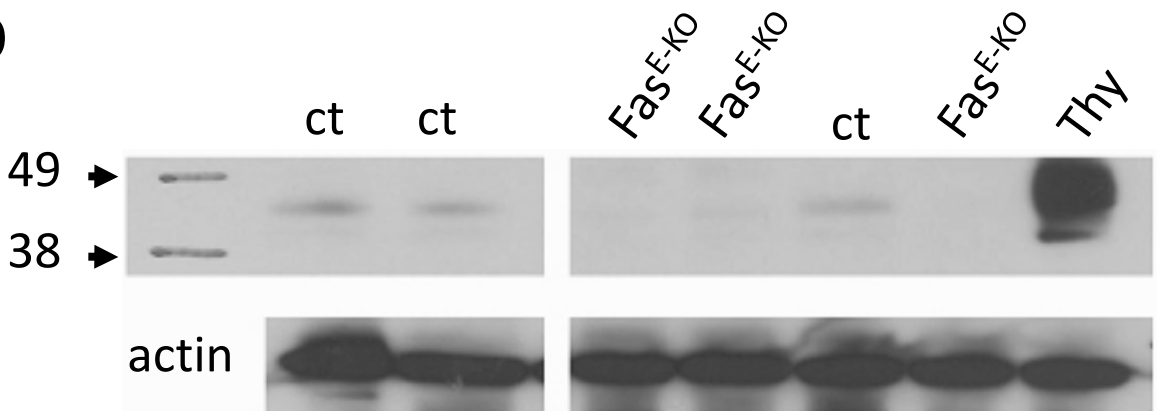

Supplement: cdd201083x1.pdf [file cdd201083x1.pdf]

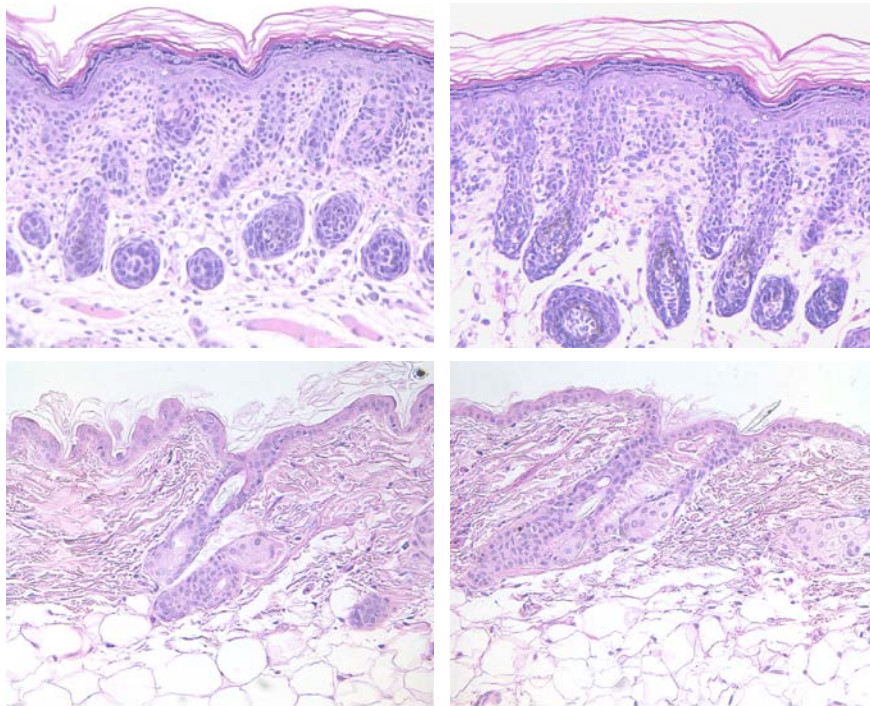

newborn

adult

Fas<sup>E-KO</sup>

ct

Supplement: cdd201083x2.pdf [file cdd201083x2.pdf]

Fas<sup>E-KO</sup>

ct

Suppl Fig. 3

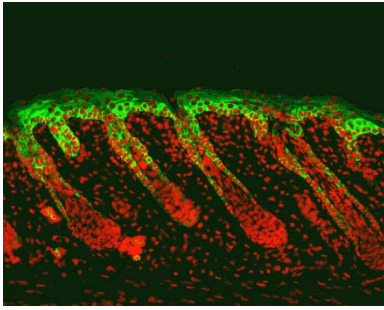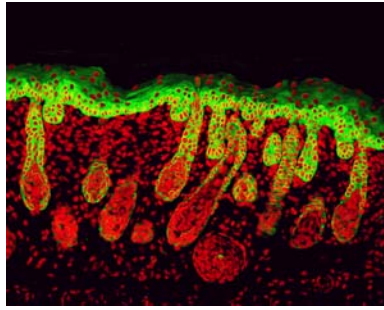

Keratin 14

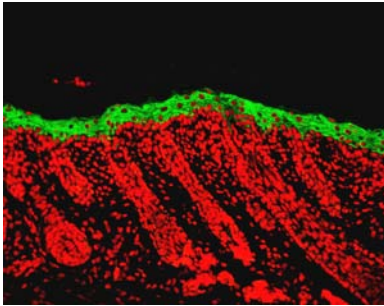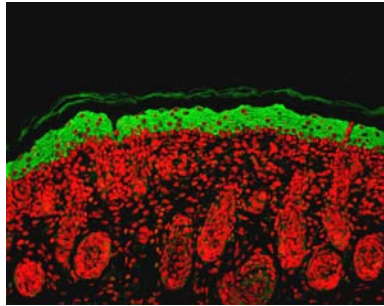

Keratin 1

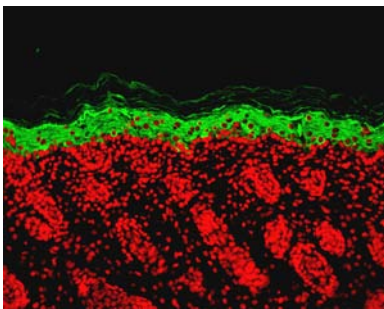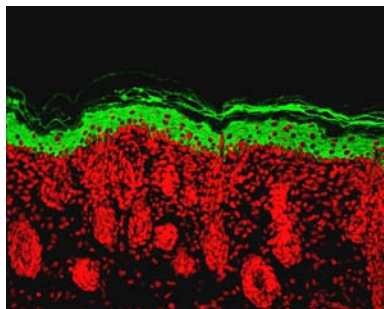

Keratin 10

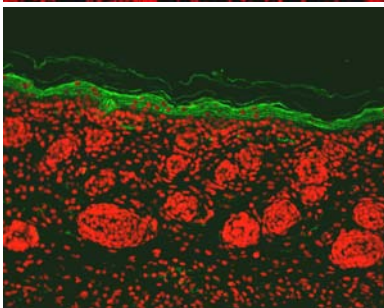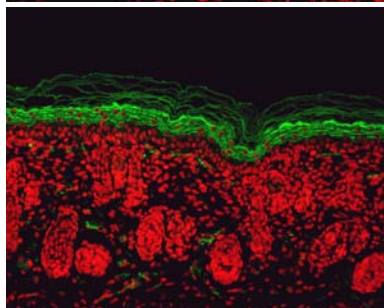

Filaggrin

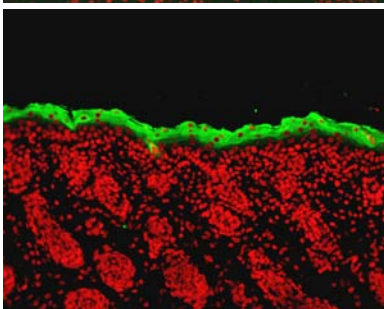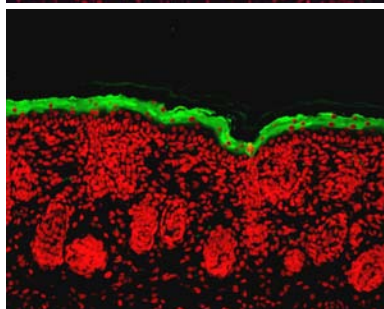

Involucrin

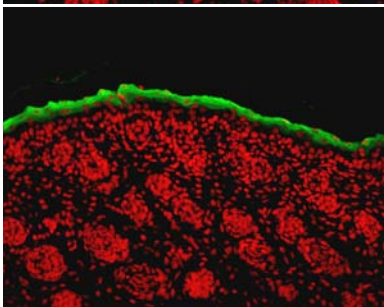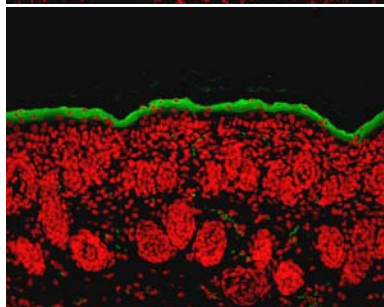

Loricrin

Supplement: cdd201083x3.pdf [file cdd201083x3.pdf]
